# Supplementary material for: Identification of the Gene Repertoire of the IMD Pathway and Expression of Antimicrobial Peptide Genes in Several Tissues and Hemolymph of the Cockroach Blattella germanica
Source: MDPI journal article supplement (doi:10.3390/ijms23158444), 2022-07-30
Supplement: s1 [file s1]

# Identification of the Gene Repertoire of the IMD Pathway and Expression of Antimicrobial Peptide Genes

in Several Tissues and Hemolymph of the Cockroach *Blattella germanica*

Zuber, L.; Domínguez-Santos, R.; García-Ferris, C. and Silva F.J.

## Supplementary Figure S1

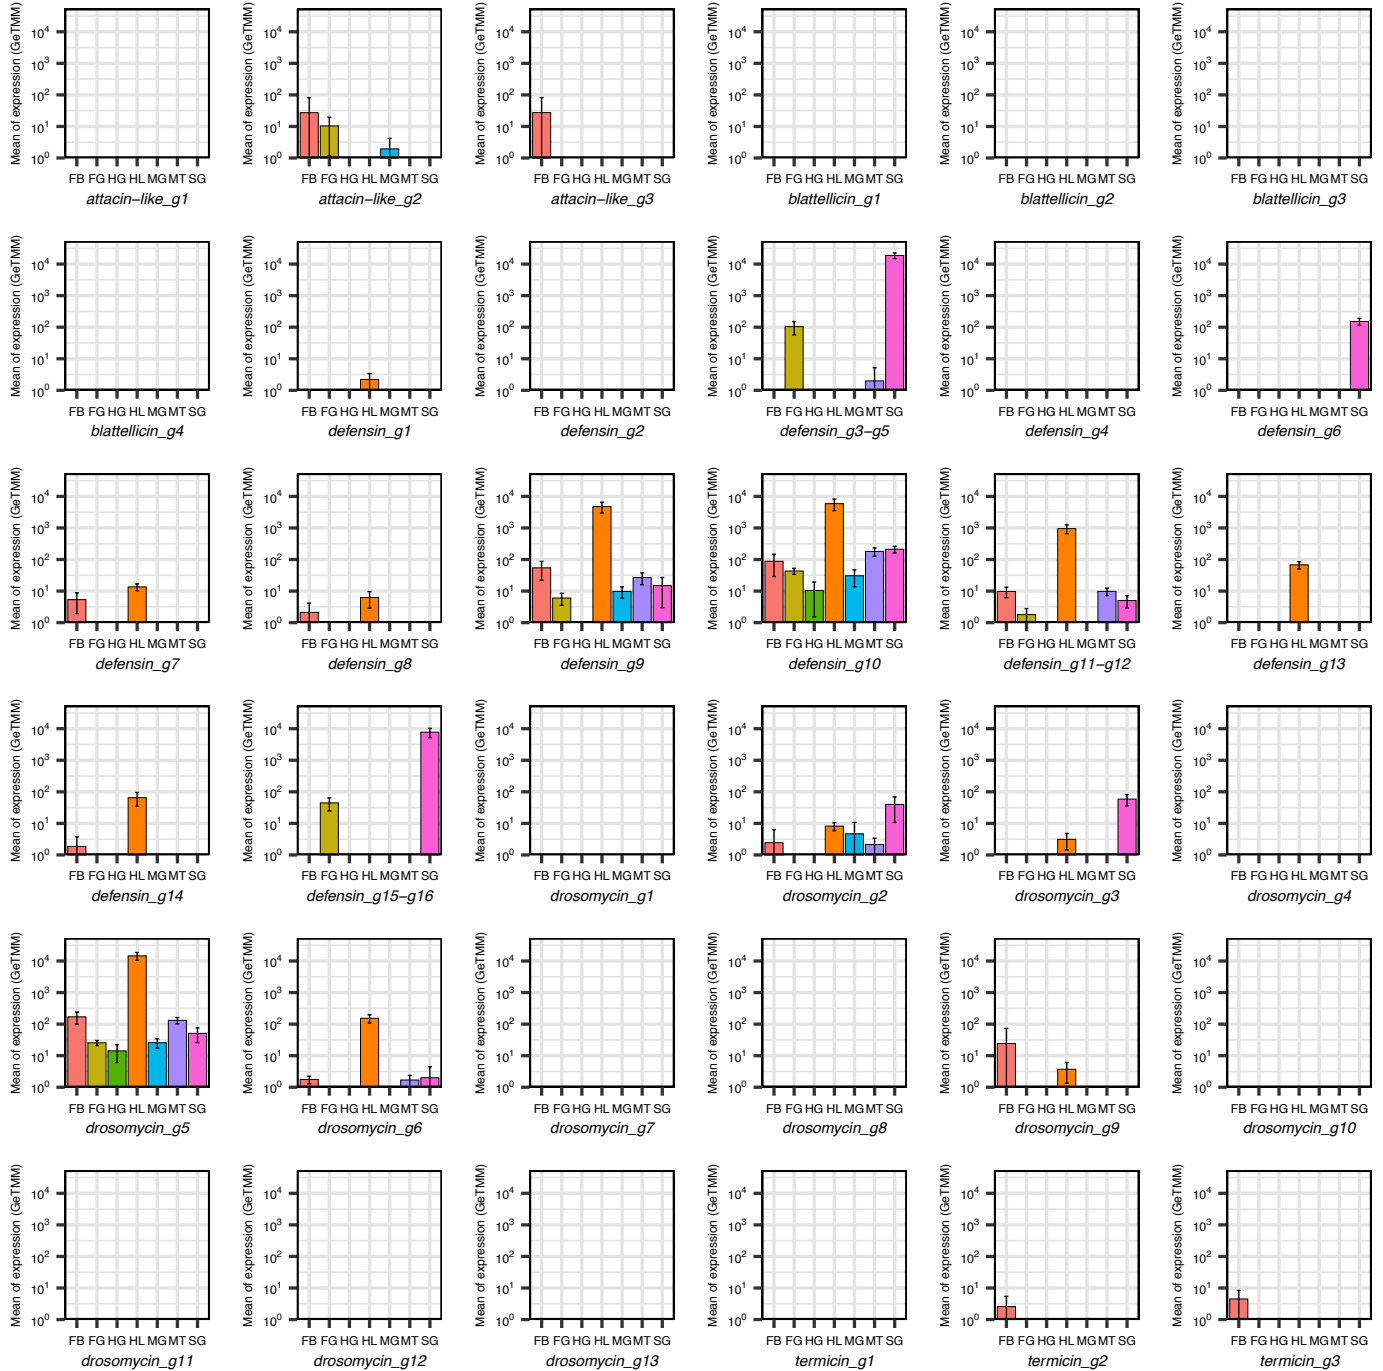

**Figure S1.** Expression patterns of each AMP gene in the analyzed sample types of *B. germanica*. Means and standard deviations of normalized expression (GeTMM) of AMP genes are shown. Abbreviations: FB (fat body), FG (foregut), HG (hindgut), HL (hemolymph), MG (midgut), MT (Malpighian tubules) and SG (salivary glands). Graph bars are standard deviations. Y-axis is in log scale. The lower ends of the error bars are not shown below  $10^0$ .
