# Supplementary material for: Identification of the Gene Repertoire of the IMD Pathway and Expression of Antimicrobial Peptide Genes in Several Tissues and Hemolymph of the Cockroach Blattella germanica
Source: MDPI journal article supplement (doi:10.3390/ijms23158444), 2022-07-30
Supplement: s1 [file s1]

Zuber, L.; Domínguez-Santos, R.; García-Ferris, C. and Silva F.J.

**Foregut**

| Gene             | Mean of expression (GeTMM) |
|------------------|----------------------------|
| attacin-like_g1  | ~10                        |
| attacin-like_g2  | ~1                         |
| attacin-like_g3  | ~0.1                       |
| blattellin_g1    | ~0.01                      |
| blattellin_g2    | ~0.001                     |
| blattellin_g3    | ~0.0001                    |
| blattellin_g4    | ~0.00001                   |
| drosomycin_g1    | ~0.000001                  |
| drosomycin_g2    | ~0.0000001                 |
| drosomycin_g3    | ~0.00000001                |
| drosomycin_g4    | ~0.000000001               |
| drosomycin_g5    | ~10                        |
| drosomycin_g6    | ~0.000001                  |
| drosomycin_g7    | ~0.0000001                 |
| drosomycin_g8    | ~0.00000001                |
| drosomycin_g9    | ~0.000000001               |
| drosomycin_g10   | ~0.0000000001              |
| drosomycin_g11   | ~0.00000000001             |
| drosomycin_g12   | ~0.000000000001            |
| drosomycin_g13   | ~0.0000000000001           |
| defensin_g1      | ~0.00000000000001          |
| defensin_g2      | ~0.000000000000001         |
| defensin_g3-g5   | ~100                       |
| defensin_g6      | ~0.0000000000000001        |
| defensin_g7      | ~0.00000000000000001       |
| defensin_g8      | ~0.000000000000000001      |
| defensin_g9      | ~10                        |
| defensin_g10     | ~10                        |
| defensin_g11-g12 | ~0.001                     |
| defensin_g13     | ~0.0001                    |
| defensin_g14     | ~0.000001                  |
| defensin_g15-g16 | ~10                        |
| termicin_g1      | ~0.000000000000000001      |
| termicin_g2      | ~0.0000000000000000001     |
| termicin_g3      | ~0.00000000000000000001    |

**Midgut**

| Gene             | Mean of expression (GeTMM)                           |
|------------------|------------------------------------------------------|
| attacin-like_g1  | ~0.000000000000000001                                |
| attacin-like_g2  | ~0.0000000000000000001                               |
| attacin-like_g3  | ~0.00000000000000000001                              |
| blattellin_g1    | ~0.000000000000000000001                             |
| blattellin_g2    | ~0.0000000000000000000001                            |
| blattellin_g3    | ~0.00000000000000000000001                           |
| blattellin_g4    | ~0.000000000000000000000001                          |
| drosomycin_g1    | ~0.0000000000000000000000001                         |
| drosomycin_g2    | ~0.00000000000000000000000001                        |
| drosomycin_g3    | ~0.000000000000000000000000001                       |
| drosomycin_g4    | ~0.0000000000000000000000000001                      |
| drosomycin_g5    | ~10                                                  |
| drosomycin_g6    | ~0.00000000000000000000000000001                     |
| drosomycin_g7    | ~0.000000000000000000000000000001                    |
| drosomycin_g8    | ~0.0000000000000000000000000000001                   |
| drosomycin_g9    | ~0.00000000000000000000000000000001                  |
| drosomycin_g10   | ~0.000000000000000000000000000000001                 |
| drosomycin_g11   | ~0.0000000000000000000000000000000001                |
| drosomycin_g12   | ~0.00000000000000000000000000000000001               |
| drosomycin_g13   | ~0.000000000000000000000000000000000001              |
| defensin_g1      | ~0.0000000000000000000000000000000000001             |
| defensin_g2      | ~0.00000000000000000000000000000000000001            |
| defensin_g3-g5   | ~0.000000000000000000000000000000000000001           |
| defensin_g6      | ~0.0000000000000000000000000000000000000001          |
| defensin_g7      | ~0.00000000000000000000000000000000000000001         |
| defensin_g8      | ~0.000000000000000000000000000000000000000001        |
| defensin_g9      | ~0.0000000000000000000000000000000000000000001       |
| defensin_g10     | ~10                                                  |
| defensin_g11-g12 | ~0.0000000000000000000000000000000000000000001       |
| defensin_g13     | ~0.00000000000000000000000000000000000000000001      |
| defensin_g14     | ~0.000000000000000000000000000000000000000000001     |
| defensin_g15-g16 | ~0.0000000000000000000000000000000000000000000001    |
| termicin_g1      | ~0.00000000000000000000000000000000000000000000001   |
| termicin_g2      | ~0.000000000000000000000000000000000000000000000001  |
| termicin_g3      | ~0.0000000000000000000000000000000000000000000000001 |

**Hindgut**

| Gene            | Mean of expression (GeTMM)              |
|-----------------|-----------------------------------------|
| attacin-like_g1 | ~0.001                                  |
| attacin-like_g2 | ~0.0001                                 |
| attacin-like_g3 | ~0.000001                               |
| blattellin_g1   | ~0.00000001                             |
| blattellin_g2   | ~0.0000000001                           |
| blattellin_g3   | ~0.000000000001                         |
| blattellin_g4   | ~0.00000000000001                       |
| drosomycin_g1   | ~0.0000000000000001                     |
| drosomycin_g2   | ~0.000000000000000001                   |
| drosomycin_g3   | ~0.00000000000000000001                 |
| drosomycin_g4   | ~0.0000000000000000000001               |
| drosomycin_g5   | ~10                                     |
| drosomycin_g6   | ~0.000000000000000000000001             |
| drosomycin_g7   | ~0.00000000000000000000000001           |
| drosomycin_g8   | ~0.0000000000000000000000000001         |
| drosomycin_g9   | ~0.000000000000000000000000000001       |
| drosomycin_g10  | ~0.00000000000000000000000000000001     |
| drosomycin_g11  | ~0.0000000000000000000000000000000001   |
| drosomycin_g12  | ~0.000000000000000000000000000000000001 |
| drosom          |                                         |

**Figure S2.** Expression of AMP genes in foregut, midgut, hindgut and Malpighian tubules. Means and standard deviations of normalized expression (GeTMM) of AMP genes in adult female tissues of *B. germanica* are shown. Graph bars are standard deviations. Y-axis is in log scale. The lower ends of the error bars are not shown below  $10^0$ .
